# Supplementary material for: Trajectories of material living standards, physical health and mental health under a universal pension
Source: PubMed Central journal article supplement — J Epidemiol Community Health. 2020 Jan 15;74(4):362–8. doi: 10.1136/jech-2019-213199 (PMC7079189; doi:10.1136/jech-2019-213199), 2020-01-15
Supplement: jech-2019-213199supp002.pdf [file jech-2019-213199supp002.pdf]

*SUPPLEMENTARY FILE 2: ELSI-SF item and subscale scores by class and subscale scores by class and age*  
*Page 1 of 4*

*Table S1 Mean ELSI-SF Ownership subscale item and total scores by living standards trajectory class (average of participant ratings over all observations ages 55-76; response weighted data presented).*

| <b>Ownership:</b> For the following questions, please indicate whether or not you have (or have access to) the item:              | <b>C3<sub>1</sub></b> | <b>C3<sub>2</sub></b> | <b>C3<sub>3</sub></b> |
|-----------------------------------------------------------------------------------------------------------------------------------|-----------------------|-----------------------|-----------------------|
| <i>Responses: Yes, I have it (1); No, because I don't want it (1); No, because of the cost (0); No, for some other reason (1)</i> | <b>Mean (SD)</b>      | <b>Mean (SD)</b>      | <b>Mean (SD)</b>      |
| Phone                                                                                                                             | 1.00 (0.04)           | 0.94 (0.19)           | 0.93 (0.18)           |
| Washing machine                                                                                                                   | 1.00 (0.02)           | 0.99 (0.09)           | 0.98 (0.09)           |
| Ability to keep main rooms adequately warm                                                                                        | 0.97 (0.12)           | 0.70 (0.33)           | 0.68 (0.34)           |
| Two pairs of shoes in a good condition and suitable for you daily activities                                                      | 1.00 (0.03)           | 0.89 (0.24)           | 0.89 (0.22)           |
| Suitable clothes for important or special occasions                                                                               | 1.00 (0.03)           | 0.83 (0.29)           | 0.84 (0.26)           |
| Home computer                                                                                                                     | 0.98 (0.08)           | 0.76 (0.34)           | 0.78 (0.31)           |
| Contents insurance                                                                                                                | 0.98 (0.12)           | 0.73 (0.37)           | 0.71 (0.36)           |
| <b>Total score [Range 0 – 7]</b>                                                                                                  | <b>6.92 (0.24)</b>    | <b>5.83 (1.13)</b>    | <b>5.82 (1.03)</b>    |

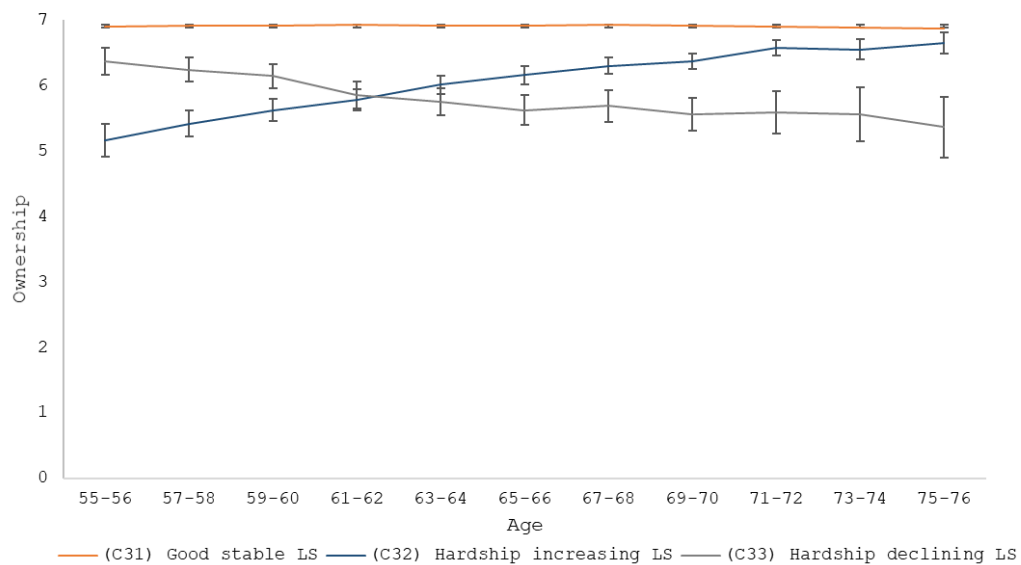

*Figure S1 Mean (95% CI) observed Ownership score by age and living standards trajectory class.*

SUPPLEMENTARY FILE 2: ELSI-SF item and subscale scores by class and subscale scores by class and age  
Page 2 of 4

Table S2 Mean ELSI-SF Social Participation subscale item and total scores by living standards trajectory class (average of participant ratings over all observations ages 55-76; response weighted data presented).

| <b>Social participation:</b> For the following questions, please indicate whether or not you do the activity:                   | <b>C3<sub>1</sub></b> | <b>C3<sub>2</sub></b> | <b>C3<sub>3</sub></b> |
|---------------------------------------------------------------------------------------------------------------------------------|-----------------------|-----------------------|-----------------------|
| <i>Responses: Yes, I do it (1); No, because I don't want to (1); No, because of the cost (0); No, for some other reason (1)</i> | <b>Mean (SD)</b>      | <b>Mean (SD)</b>      | <b>Mean (SD)</b>      |
| Presents for family/friends on special occasions                                                                                | 0.98 (0.09)           | 0.77 (0.32)           | 0.71 (0.32)           |
| Visit hairdresser at least once every three months                                                                              | 0.97 (0.11)           | 0.68 (0.37)           | 0.65 (0.38)           |
| Holiday away from home at least once every year                                                                                 | 0.92 (0.19)           | 0.40 (0.35)           | 0.34 (0.34)           |
| Space for family to stay the night                                                                                              | 1.00 (0.04)           | 0.96 (0.14)           | 0.97 (0.13)           |
| Overseas holiday at least once every three years                                                                                | 0.82 (0.29)           | 0.33 (0.33)           | 0.27 (0.32)           |
| Night out for entertainment or socialising at least once a fortnight                                                            | 0.92 (0.19)           | 0.49 (0.36)           | 0.46 (0.35)           |
| Family/friends over for a meal at least once each few months                                                                    | 0.99 (0.06)           | 0.81 (0.28)           | 0.81 (0.27)           |
| <b>Total score [Range 0 - 7]</b>                                                                                                | <b>6.60 (0.64)</b>    | <b>4.44 (1.38)</b>    | <b>4.21 (1.31)</b>    |

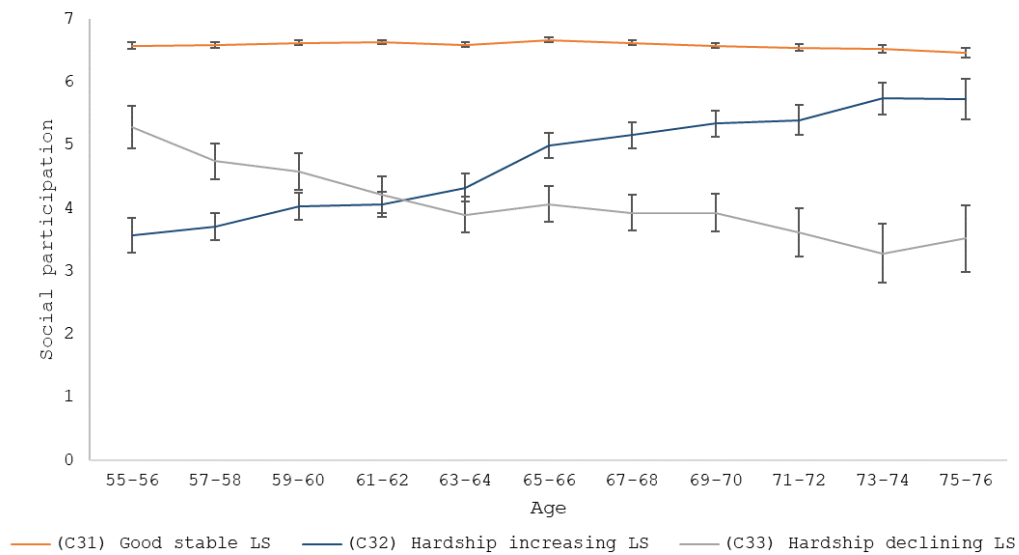

Figure S2 Mean (95% CI) observed Social Participation score by age and living standards trajectory class.

*SUPPLEMENTARY FILE 2: ELSI-SF item and subscale scores by class and subscale scores by class and age*  
 Page 3 of 4

*Table S3 Mean ELSI-SF Economising subscale item and total scores by living standards trajectory class (average of participant ratings over all observations ages 55-76; response weighted data presented).*

| <b>Economising:</b> The following are a list of things some people do to help keep costs down. In the last 12 months, have you done any of these things? | <b>C3<sub>1</sub></b> | <b>C3<sub>2</sub></b> | <b>C3<sub>3</sub></b> |
|----------------------------------------------------------------------------------------------------------------------------------------------------------|-----------------------|-----------------------|-----------------------|
| <i>Responses: not at all (2); a little (1); a lot (0).</i>                                                                                               | <b>Mean (SD)</b>      | <b>Mean (SD)</b>      | <b>Mean (SD)</b>      |
| Gone without or cut back on fresh fruit and vegetables                                                                                                   | 1.86 (0.27)           | 1.06 (0.58)           | 1.00 (0.52)           |
| Continued wearing worn out clothes                                                                                                                       | 1.81 (0.32)           | 0.96 (0.57)           | 0.82 (0.50)           |
| Put off buying new clothes as long as possible                                                                                                           | 1.51 (0.49)           | 0.55 (0.48)           | 0.44 (0.42)           |
| Stayed in bed to keep warm                                                                                                                               | 1.91 (0.23)           | 1.31 (0.61)           | 1.15 (0.60)           |
| Postponed a visit to the doctor                                                                                                                          | 1.88 (0.25)           | 1.15 (0.58)           | 1.08 (0.56)           |
| Not picked up a prescription                                                                                                                             | 1.97 (0.12)           | 1.55 (0.53)           | 1.52 (0.50)           |
| Spent less on hobbies or other special interests than you would like                                                                                     | 1.65 (0.42)           | 0.71 (0.50)           | 0.61 (0.47)           |
| Do without or cut back on trips to the shops or other local places                                                                                       | 1.62 (0.42)           | 0.66 (0.48)           | 0.55 (0.42)           |
| <b>Total score [Range 0 - 16]</b>                                                                                                                        | <b>14.21 (1.82)</b>   | <b>7.94 (2.96)</b>    | <b>7.16 (2.56)</b>    |

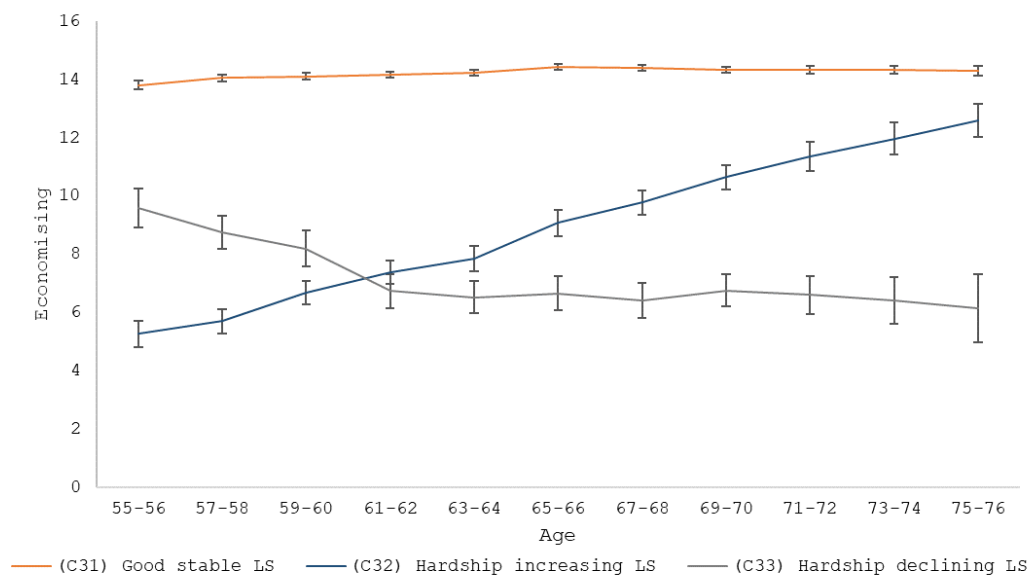

*Figure S3 Mean (95% CI) observed Economising score by age and living standards trajectory class.*

SUPPLEMENTARY FILE 2: ELSI-SF item and subscale scores by class and subscale scores by class and age  
Page 4 of 4

Table S4 Mean ELSI-SF Global Self-Rating subscale item and total scores by living standards trajectory class (average of participant ratings over all observations ages 55-76; response weighted data presented).

| Global self-ratings: The following questions are about your material standard of living – the things that money can buy. Your material standard of living does NOT include your capacity to enjoy life. You should NOT take your health into account. | C3 <sub>1</sub>    | C3 <sub>2</sub>    | C3 <sub>3</sub>    |
|-------------------------------------------------------------------------------------------------------------------------------------------------------------------------------------------------------------------------------------------------------|--------------------|--------------------|--------------------|
|                                                                                                                                                                                                                                                       | Mean (SD)          | Mean (SD)          | Mean (SD)          |
| Generally, how would you rate your material standard of living?<br><i>Responses: High (4) Fairly high (3) Medium (2) Fairly low (1) Low (0)</i>                                                                                                       | 2.68 (0.64)        | 1.71 (0.57)        | 1.71 (0.58)        |
| Generally, how satisfied are you with your current material standard of living?<br><i>Responses: Very satisfied (4) Satisfied (3) Neither satisfied nor dissatisfied (2) Dissatisfied (1) Very dissatisfied (0)</i>                                   | 3.13 (0.56)        | 2.11 (0.77)        | 2.05 (0.66)        |
| How well does your total income meet your everyday needs for such things as accommodation, food, clothing and other necessities?<br><i>Responses: Not enough (0) Just enough (1) Enough (2) More than enough (3)</i>                                  | 1.96 (0.67)        | 0.71 (0.57)        | 0.66 (0.49)        |
| <b>Total score [Range 0 - 11]</b>                                                                                                                                                                                                                     | <b>7.78 (1.59)</b> | <b>4.53 (1.57)</b> | <b>4.42 (1.32)</b> |

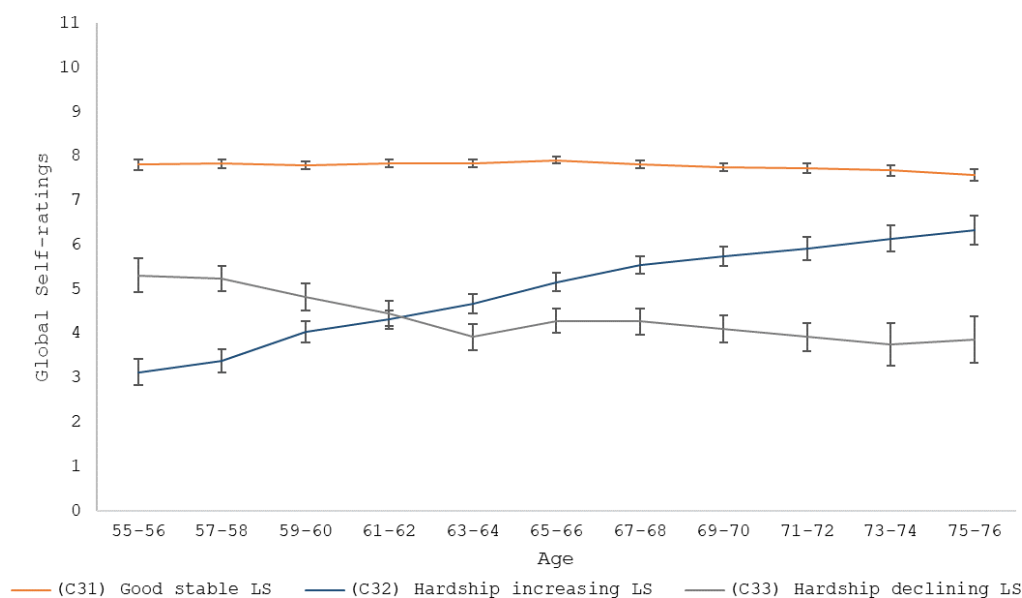

Figure S4 Mean (95% CI) observed Global Self-Rating score by age and living standards trajectory class.
