# Supplementary material for: Trajectories of material living standards, physical health and mental health under a universal pension
Source: PubMed Central journal article supplement — J Epidemiol Community Health. 2020 Jan 15;74(4):362–8. doi: 10.1136/jech-2019-213199 (PMC7079189; doi:10.1136/jech-2019-213199), 2020-01-15

## SUPPLEMENTARY FILE 3: PCS and MCS with age by living standards trajectory

Page 1 of 1

Figure S1 Observed mean and 95% CI for Physical Component Scores with age by living standards trajectory. Dotted line indicates adult population mean.

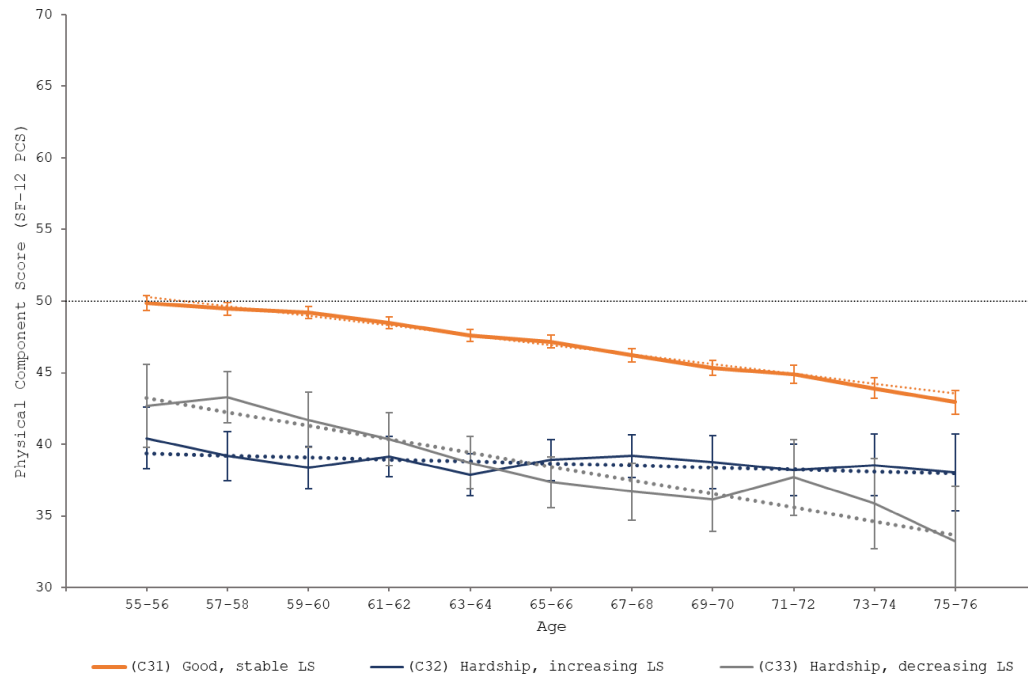

Figure S2 Observed mean and 95% CI for Mental Component Scores with age by living standards trajectory. Dotted line indicates adult population mean.

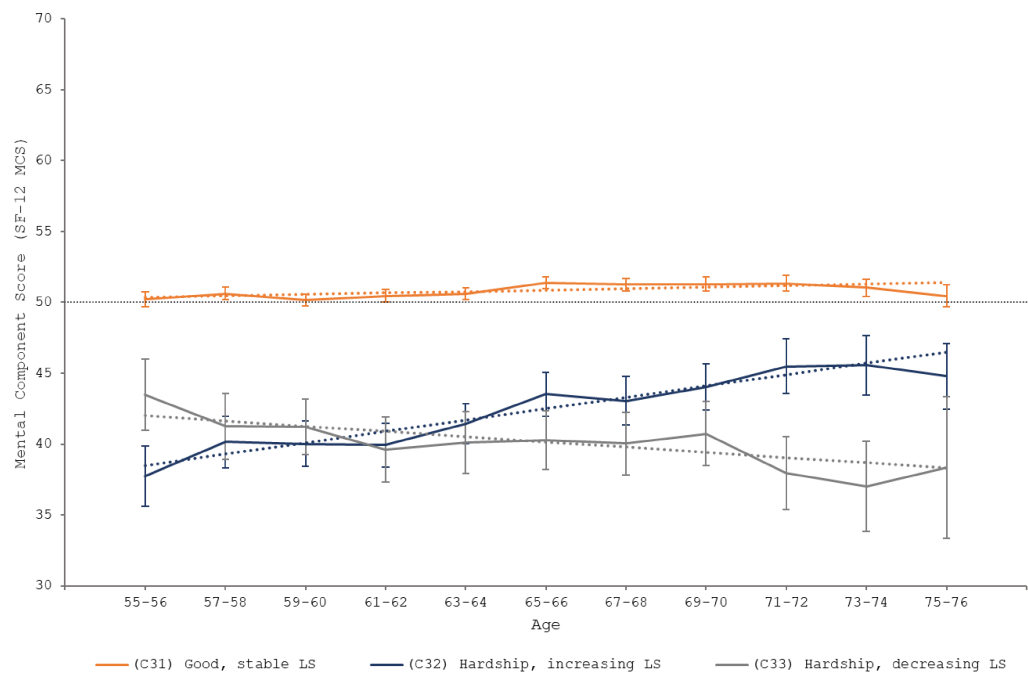

Supplement: jech-2019-213199supp003.pdf [file jech-2019-213199supp003.pdf]
